# Supplementary material
Source: PubMed Central journal article supplement (PMC212801)
Supplement: nar_31_17_5195__1.pdf [file nar_31_17_5195__1.pdf]

## Supplementary Material

**Table S1.** Base Appearance at the Second Codon

| Species                       | 1 <sup>st</sup> letter |          |          | 2 <sup>nd</sup> letter |          |          | 3 <sup>rd</sup> letter |          |          |          |
|-------------------------------|------------------------|----------|----------|------------------------|----------|----------|------------------------|----------|----------|----------|
|                               | Base                   | <i>O</i> | <i>E</i> | <i>Z</i>               | <i>O</i> | <i>E</i> | <i>Z</i>               | <i>O</i> | <i>E</i> | <i>Z</i> |
| <b><i>H. sapiens</i></b>      |                        |          |          |                        |          |          |                        |          |          |          |
| A                             | 21.9                   | 26.8     | -12.4    | 26.8                   | 31.4     | -11.0    | 15.5                   | 19.2     | -10.6    |          |
| T                             | 13.6                   | 16.9     | -9.9     | 14.8                   | 26.3     | -29.6    | 20.6                   | 22.3     | -4.5     |          |
| G                             | 49.3*                  | 31.8     | 42.7     | 18.6                   | 18.9     | -1.0     | 37.7*                  | 28.7     | 22.6     |          |
| C                             | 15.2                   | 24.6     | -24.7    | 39.8*                  | 23.4     | 43.8     | 26.2                   | 29.9     | -9.1     |          |
| <b><i>D. melanogaster</i></b> |                        |          |          |                        |          |          |                        |          |          |          |
| A                             | 25.4                   | 27.5     | -5.3     | 30.0                   | 32.7     | -6.5     | 17.8*                  | 15.9     | 6.0      |          |
| T                             | 20.7*                  | 16.5     | 12.5     | 19.0                   | 25.9     | -17.7    | 21.3*                  | 19.7     | 4.3      |          |
| G                             | 34.5*                  | 31.1     | 8.2      | 17.3                   | 17.9     | -1.6     | 30.1                   | 31.7     | -3.9     |          |
| C                             | 19.5                   | 24.9     | -14.0    | 33.8*                  | 23.6     | 26.8     | 30.8                   | 32.7     | -4.5     |          |
| <b><i>C. elegans</i></b>      |                        |          |          |                        |          |          |                        |          |          |          |
| A                             | 31.6*                  | 30.1     | 4.5      | 28.8                   | 32.7     | -11.5    | 25.1                   | 28.8     | -11.3    |          |
| T                             | 21.6*                  | 20.4     | 4.2      | 19.9                   | 28.7     | -26.5    | 30.4                   | 31.4     | -3.2     |          |
| G                             | 28.3                   | 29.5     | -3.5     | 18.4*                  | 15.7     | 10.2     | 20.5                   | 20.0     | 1.7      |          |
| C                             | 18.5                   | 20.1     | -5.3     | 32.9*                  | 22.9     | 32.5     | 24.1*                  | 19.7     | 14.9     |          |
| <b><i>A. thaliana</i></b>     |                        |          |          |                        |          |          |                        |          |          |          |
| A                             | 22.6                   | 29.3     | -23.2    | 31.3                   | 31.7     | -1.4     | 21.4                   | 25.1     | -13.8    |          |
| T                             | 13.1                   | 20.1     | -27.6    | 15.4                   | 28.2     | -45.0    | 33.3                   | 33.0     | 0.9      |          |
| G                             | 56.9*                  | 31.7     | 85.6     | 16.4                   | 17.4     | -4.3     | 34.3*                  | 22.5     | 44.3     |          |
| C                             | 7.4                    | 18.9     | -46.5    | 36.9*                  | 22.6     | 53.9     | 11.1                   | 19.3     | -32.8    |          |
| <b><i>O. sativa</i></b>       |                        |          |          |                        |          |          |                        |          |          |          |
| A                             | 18.4                   | 23.6     | -9.3     | 25.0                   | 26.4     | -2.3     | 15.5                   | 15.7     | -0.5     |          |
| T                             | 9.6                    | 16.3     | -13.8    | 14.4                   | 24.7     | -18.3    | 18.1                   | 18.7     | -1.2     |          |
| G                             | 53.5*                  | 35.6     | 28.6     | 21.1                   | 22.0     | -1.6     | 42.3*                  | 31.4     | 18.1     |          |
| C                             | 18.4                   | 24.5     | -10.8    | 39.5*                  | 26.9     | 21.6     | 24.1                   | 34.2     | -16.3    |          |
| <b><i>S. cerevisiae</i></b>   |                        |          |          |                        |          |          |                        |          |          |          |
| A                             | 31.7                   | 33.5     | -2.9     | 26.6                   | 35.2     | -14.1    | 28.3                   | 29.3     | -1.6     |          |
| T                             | 26.0*                  | 22.1     | 7.3      | 21.1                   | 28.3     | -12.4    | 36.4*                  | 32.7     | 6.1      |          |
| G                             | 29.4                   | 28.3     | 1.9      | 15.4                   | 14.2     | 2.6      | 16.3                   | 18.7     | -4.9     |          |
| C                             | 12.9                   | 16.2     | -6.9     | 37.0*                  | 22.4     | 27.4     | 19.0                   | 19.3     | -0.5     |          |

***S. pombe***

|   |       |      |      |       |      |       |       |      |      |
|---|-------|------|------|-------|------|-------|-------|------|------|
| A | 29.7  | 29.4 | 0.4  | 29.5  | 33.0 | -5.0  | 25.8  | 27.1 | -2.0 |
| T | 23.7  | 22.6 | 1.6  | 17.0  | 28.7 | -17.4 | 43.2* | 39.8 | 4.7  |
| G | 32.9* | 29.1 | 5.5  | 16.5* | 14.8 | 3.1   | 17.5  | 16.5 | 1.8  |
| C | 13.8  | 18.8 | -8.6 | 37.0* | 23.4 | 21.6  | 13.5  | 16.6 | -5.6 |

The observed (*O*) and expected (*E*) fractions of each base at the first, second and third letters in the second codon are given in percentage. The biases are evaluated by the Z-test (see Methods). An asterisk shows the value significantly larger than the expectation ( $p < 0.1\%$ ).

**Table S2.** Position-dependent Base Biases

| Codon Number              | A     | T     | G     | C     |
|---------------------------|-------|-------|-------|-------|
| <b><i>H. sapiens</i></b>  |       |       |       |       |
| <i>E</i>                  | 19.2  | 22.3  | 28.7  | 29.9  |
| 2                         | 15.5  | 20.6  | 37.7* | 26.2  |
| 12                        | 14.8  | 17.7  | 35.4* | 32.1* |
| -4                        | 21.5* | 23.2  | 27.2  | 28.1  |
| -2                        | 18.4  | 18.8  | 25.8  | 37.0* |
| <b><i>A. thaliana</i></b> |       |       |       |       |
| <i>E</i>                  | 25.1  | 33.0  | 22.5  | 19.3  |
| 2                         | 21.4  | 33.3  | 34.3* | 11.1  |
| 4                         | 28.2* | 30.6  | 22.8  | 18.5  |
| 37                        | 23.3  | 32.8  | 19.2  | 24.7* |
| -40                       | 26.9* | 29.6  | 25.6* | 17.9  |
| -2                        | 21.3  | 35.4* | 20.1  | 23.1* |

The fraction of each base at the third letter in a given codon position and the expected value (*E*) are shown in percentage. An asterisk shows the value significantly larger than the expectation ( $p < 0.1\%$ ).
